# Supplementary material for: Supramolecular stabilization of hydroxylamine TEMPOH by complexation with an amphiphilic calixarene
Source: Royal Society of Chemistry journal article supplement (doi:10.1039/b511810g), 2005-12-07
Supplement: b511810g.pdf [file b511810g.pdf]

## Supramolecular stabilization of hydroxylamine TEMPOH by complexation with an amphiphilic calixarene

Gennady S. Ananchenko,\* Michaela Pojarova, Konstantin A. Udachin, Donald M. Leek, Antony W. Coleman and John A. Ripmeester

Table 1. Crystal data and structure refinement for Gena34.

|                                   |                                             |                             |
|-----------------------------------|---------------------------------------------|-----------------------------|
| Identification code               | gena34                                      |                             |
| Empirical formula                 | C63 H91 N O11                               |                             |
| Formula weight                    | 1038.37                                     |                             |
| Temperature                       | 125(2) K                                    |                             |
| Wavelength                        | 0.71070 Å                                   |                             |
| Crystal system                    | Monoclinic                                  |                             |
| Space group                       | P2(1)/c                                     |                             |
| Unit cell dimensions              | a = 10.4572(18) Å                           | $\alpha = 90^\circ$ .       |
|                                   | b = 22.041(4) Å                             | $\beta = 95.870(3)^\circ$ . |
|                                   | c = 24.899(4) Å                             | $\gamma = 90^\circ$ .       |
| Volume                            | 5708.8(17) Å <sup>3</sup>                   |                             |
| Z                                 | 4                                           |                             |
| Density (calculated)              | 1.208 Mg/m <sup>3</sup>                     |                             |
| Absorption coefficient            | 0.081 mm <sup>-1</sup>                      |                             |
| F(000)                            | 2256                                        |                             |
| Crystal size                      | 0.50 x 0.10 x 0.10 mm <sup>3</sup>          |                             |
| Theta range for data collection   | 1.64 to 29.57°.                             |                             |
| Index ranges                      | -14 ≤ h ≤ 14, -30 ≤ k ≤ 30, -34 ≤ l ≤ 34    |                             |
| Reflections collected             | 70995                                       |                             |
| Independent reflections           | 15946 [R(int) = 0.0425]                     |                             |
| Completeness to theta = 29.57°    | 99.5 %                                      |                             |
| Absorption correction             | Multiscan                                   |                             |
| Max. and min. transmission        | 0.9919 and 0.9605                           |                             |
| Refinement method                 | Full-matrix least-squares on F <sup>2</sup> |                             |
| Data / restraints / parameters    | 15946 / 9 / 729                             |                             |
| Goodness-of-fit on F <sup>2</sup> | 1.030                                       |                             |
| Final R indices [I > 2σ(I)]       | R1 = 0.0513, wR2 = 0.1338                   |                             |
| R indices (all data)              | R1 = 0.0801, wR2 = 0.1559                   |                             |
| Largest diff. peak and hole       | 0.952 and -0.522 e.Å <sup>-3</sup>          |                             |

Table 2. Atomic coordinates ( $\times 10^4$ ) and equivalent isotropic displacement parameters ( $\text{\AA}^2 \times 10^3$ ) for Gena34.  $U(\text{eq})$  is defined as one third of the trace of the orthogonalized  $U^{ij}$  tensor.

|        | x         | y       | z        | U(eq) |
|--------|-----------|---------|----------|-------|
| O(11)  | -1474(2)  | 7467(1) | 6921(1)  | 45(1) |
| C(62)  | -2762(3)  | 7741(1) | 6955(1)  | 47(1) |
| C(63)  | -3602(3)  | 7680(1) | 6430(1)  | 44(1) |
| O(11A) | -2253(9)  | 8215(3) | 7191(3)  | 45(1) |
| C(62A) | -2499(13) | 7697(7) | 6856(5)  | 47(1) |
| C(63A) | -3786(14) | 7790(7) | 6532(6)  | 44(1) |
| O(11B) | -404(8)   | 7424(4) | 6990(3)  | 45(1) |
| C(62B) | -1699(11) | 7526(9) | 6860(6)  | 47(1) |
| C(63B) | -2981(12) | 7753(6) | 7088(6)  | 44(1) |
| O(1)   | 3224(1)   | 8377(1) | 9344(1)  | 27(1) |
| O(2)   | 3365(1)   | 8444(1) | 10507(1) | 23(1) |
| O(3)   | 3280(1)   | 7232(1) | 10275(1) | 23(1) |
| O(4)   | 3595(1)   | 7259(1) | 9251(1)  | 21(1) |
| O(5)   | -1208(1)  | 9272(1) | 7632(1)  | 47(1) |
| O(6)   | -2544(1)  | 9109(1) | 10301(1) | 27(1) |
| O(7)   | -879(1)   | 5227(1) | 10637(1) | 36(1) |
| O(8)   | -897(1)   | 6336(1) | 7533(1)  | 39(1) |
| O(9)   | -4237(1)  | 7151(1) | 8848(1)  | 31(1) |
| O(10)  | -4332(1)  | 8255(1) | 9871(1)  | 32(1) |
| N(1)   | -3246(1)  | 7445(1) | 9184(1)  | 21(1) |
| C(1)   | 2087(1)   | 7262(1) | 8456(1)  | 20(1) |
| C(2)   | 2537(1)   | 7878(1) | 8280(1)  | 22(1) |
| C(3)   | 1859(1)   | 8416(1) | 8508(1)  | 20(1) |
| C(4)   | 878(1)    | 8716(1) | 8203(1)  | 21(1) |
| C(5)   | 297(1)    | 9233(1) | 8395(1)  | 20(1) |
| C(6)   | 706(1)    | 9444(1) | 8914(1)  | 20(1) |
| C(7)   | 1669(1)   | 9145(1) | 9239(1)  | 19(1) |
| C(8)   | 2108(1)   | 9348(1) | 9810(1)  | 19(1) |
| C(9)   | 1451(1)   | 8990(1) | 10225(1) | 18(1) |
| C(10)  | 167(1)    | 9098(1) | 10283(1) | 19(1) |
| C(11)  | -489(1)   | 8779(1) | 10652(1) | 20(1) |
| C(12)  | 144(1)    | 8311(1) | 10949(1) | 20(1) |

Supplementary Material (ESI) for Chemical Communications  
This journal is © The Royal Society of Chemistry 2006

|       |          |          |          |       |
|-------|----------|----------|----------|-------|
| C(13) | 1411(1)  | 8164(1)  | 10881(1) | 19(1) |
| C(14) | 2023(1)  | 7611(1)  | 11167(1) | 21(1) |
| C(15) | 1681(1)  | 7026(1)  | 10859(1) | 20(1) |
| C(16) | 706(1)   | 6653(1)  | 11008(1) | 21(1) |
| C(17) | 357(1)   | 6123(1)  | 10722(1) | 20(1) |
| C(18) | 1007(1)  | 5971(1)  | 10277(1) | 20(1) |
| C(19) | 1981(1)  | 6330(1)  | 10115(1) | 20(1) |
| C(20) | 2678(1)  | 6138(1)  | 9634(1)  | 21(1) |
| C(21) | 2157(1)  | 6424(1)  | 9105(1)  | 20(1) |
| C(22) | 1183(1)  | 6138(1)  | 8778(1)  | 21(1) |
| C(23) | 656(1)   | 6395(1)  | 8291(1)  | 22(1) |
| C(24) | 1121(1)  | 6959(1)  | 8141(1)  | 22(1) |
| C(25) | 2249(1)  | 8636(1)  | 9029(1)  | 20(1) |
| C(26) | 2079(1)  | 8525(1)  | 10537(1) | 19(1) |
| C(27) | 2309(1)  | 6862(1)  | 10408(1) | 20(1) |
| C(28) | 2629(1)  | 6986(1)  | 8941(1)  | 19(1) |
| C(29) | -743(1)  | 9530(1)  | 8037(1)  | 25(1) |
| C(30) | -1210(1) | 10157(1) | 8173(1)  | 25(1) |
| C(31) | -2275(1) | 10385(1) | 7759(1)  | 24(1) |
| C(32) | -2774(1) | 11013(1) | 7878(1)  | 25(1) |
| C(33) | -3841(1) | 11213(1) | 7452(1)  | 28(1) |
| C(34) | -4361(2) | 11839(1) | 7559(1)  | 35(1) |
| C(35) | -1862(1) | 8928(1)  | 10699(1) | 22(1) |
| C(36) | -2364(1) | 8858(1)  | 11240(1) | 34(1) |
| C(37) | -3706(1) | 9119(1)  | 11278(1) | 33(1) |
| C(38) | -3698(1) | 9814(1)  | 11259(1) | 34(1) |
| C(39) | -4967(2) | 10122(1) | 11333(1) | 38(1) |
| C(40) | -5975(2) | 10033(1) | 10862(1) | 46(1) |
| C(41) | -684(1)  | 5711(1)  | 10870(1) | 24(1) |
| C(42) | -1479(1) | 5903(1)  | 11313(1) | 26(1) |
| C(43) | -2566(1) | 5469(1)  | 11415(1) | 25(1) |
| C(44) | -3720(1) | 5482(1)  | 10990(1) | 25(1) |
| C(45) | -4747(1) | 5025(1)  | 11108(1) | 28(1) |
| C(46) | -5957(2) | 5070(1)  | 10714(1) | 42(1) |
| C(47) | -388(1)  | 6092(1)  | 7941(1)  | 25(1) |
| C(48) | -811(1)  | 5467(1)  | 8105(1)  | 26(1) |
| C(49) | -1938(1) | 5195(1)  | 7754(1)  | 30(1) |

Supplementary Material (ESI) for Chemical Communications  
This journal is © The Royal Society of Chemistry 2006

|       |          |         |         |       |
|-------|----------|---------|---------|-------|
| C(50) | -2312(1) | 4577(1) | 7964(1) | 30(1) |
| C(51) | -3474(2) | 4289(1) | 7644(1) | 36(1) |
| C(52) | -3906(2) | 3708(1) | 7900(1) | 55(1) |
| C(53) | -2486(1) | 7851(1) | 8827(1) | 26(1) |
| C(54) | -1411(1) | 8144(1) | 9199(1) | 27(1) |
| C(55) | -593(1)  | 7692(1) | 9545(1) | 26(1) |
| C(56) | -1444(1) | 7334(1) | 9891(1) | 25(1) |
| C(57) | -2517(1) | 6984(1) | 9565(1) | 23(1) |
| C(58) | -1975(1) | 7489(1) | 8374(1) | 37(1) |
| C(59) | -3430(2) | 8331(1) | 8586(1) | 40(1) |
| C(60) | -2007(1) | 6455(1) | 9255(1) | 35(1) |
| C(61) | -3490(1) | 6749(1) | 9929(1) | 32(1) |

---

Table 3. Bond lengths [Å] and angles [°] for Gena34.

---

|               |            |
|---------------|------------|
| O(11)-C(62)   | 1.486(3)   |
| C(62)-C(63)   | 1.504(3)   |
| O(11A)-C(62A) | 1.422(13)  |
| C(62A)-C(63A) | 1.511(15)  |
| O(11B)-C(62B) | 1.379(13)  |
| C(62B)-C(63B) | 1.589(14)  |
| O(1)-C(25)    | 1.3478(14) |
| O(2)-C(26)    | 1.3655(15) |
| O(3)-C(27)    | 1.3690(15) |
| O(4)-C(28)    | 1.3475(14) |
| O(5)-C(29)    | 1.2151(16) |
| O(6)-C(35)    | 1.2263(15) |
| O(7)-C(41)    | 1.2194(16) |
| O(8)-C(47)    | 1.2234(16) |
| O(9)-N(1)     | 1.4199(13) |
| N(1)-C(57)    | 1.5371(16) |
| N(1)-C(53)    | 1.5388(17) |
| C(1)-C(24)    | 1.3857(17) |
| C(1)-C(28)    | 1.4169(17) |
| C(1)-C(2)     | 1.5184(16) |
| C(2)-C(3)     | 1.5200(16) |
| C(3)-C(4)     | 1.3818(17) |
| C(3)-C(25)    | 1.4043(16) |
| C(4)-C(5)     | 1.4002(17) |
| C(5)-C(6)     | 1.3981(16) |
| C(5)-C(29)    | 1.4868(17) |
| C(6)-C(7)     | 1.3920(16) |
| C(7)-C(25)    | 1.4020(16) |
| C(7)-C(8)     | 1.5157(16) |
| C(8)-C(9)     | 1.5198(16) |
| C(9)-C(10)    | 1.3852(17) |
| C(9)-C(26)    | 1.4071(16) |
| C(10)-C(11)   | 1.3931(17) |
| C(11)-C(12)   | 1.3960(16) |
| C(11)-C(35)   | 1.4892(17) |

|             |            |
|-------------|------------|
| C(12)-C(13) | 1.3905(17) |
| C(13)-C(26) | 1.4055(17) |
| C(13)-C(14) | 1.5209(16) |
| C(14)-C(15) | 1.5232(16) |
| C(15)-C(16) | 1.3890(17) |
| C(15)-C(27) | 1.4048(17) |
| C(16)-C(17) | 1.3987(16) |
| C(17)-C(18) | 1.3973(17) |
| C(17)-C(41) | 1.4927(17) |
| C(18)-C(19) | 1.3845(17) |
| C(19)-C(27) | 1.4056(16) |
| C(19)-C(20) | 1.5238(17) |
| C(20)-C(21) | 1.5113(17) |
| C(21)-C(22) | 1.3887(16) |
| C(21)-C(28) | 1.4075(17) |
| C(22)-C(23) | 1.3980(17) |
| C(23)-C(24) | 1.4001(17) |
| C(23)-C(47) | 1.4851(17) |
| C(29)-C(30) | 1.5150(18) |
| C(30)-C(31) | 1.5250(17) |
| C(31)-C(32) | 1.5193(18) |
| C(32)-C(33) | 1.5245(18) |
| C(33)-C(34) | 1.516(2)   |
| C(35)-C(36) | 1.5016(19) |
| C(36)-C(37) | 1.529(2)   |
| C(37)-C(38) | 1.533(2)   |
| C(38)-C(39) | 1.519(2)   |
| C(39)-C(40) | 1.508(2)   |
| C(41)-C(42) | 1.5088(18) |
| C(42)-C(43) | 1.5264(18) |
| C(43)-C(44) | 1.5225(18) |
| C(44)-C(45) | 1.5228(18) |
| C(45)-C(46) | 1.524(2)   |
| C(47)-C(48) | 1.5154(19) |
| C(48)-C(49) | 1.5161(18) |
| C(49)-C(50) | 1.5262(19) |
| C(50)-C(51) | 1.521(2)   |

|             |            |
|-------------|------------|
| C(51)-C(52) | 1.519(2)   |
| C(53)-C(58) | 1.521(2)   |
| C(53)-C(54) | 1.5248(18) |
| C(53)-C(59) | 1.528(2)   |
| C(54)-C(55) | 1.5219(19) |
| C(55)-C(56) | 1.5205(19) |
| C(56)-C(57) | 1.5254(17) |
| C(57)-C(61) | 1.5224(19) |
| C(57)-C(60) | 1.5243(19) |

|                      |            |
|----------------------|------------|
| O(11)-C(62)-C(63)    | 111.54(19) |
| O(11A)-C(62A)-C(63A) | 107.6(11)  |
| O(11B)-C(62B)-C(63B) | 144.2(13)  |
| O(9)-N(1)-C(57)      | 110.35(9)  |
| O(9)-N(1)-C(53)      | 108.26(9)  |
| C(57)-N(1)-C(53)     | 119.17(9)  |
| C(24)-C(1)-C(28)     | 118.80(11) |
| C(24)-C(1)-C(2)      | 119.76(11) |
| C(28)-C(1)-C(2)      | 121.44(11) |
| C(1)-C(2)-C(3)       | 114.80(10) |
| C(4)-C(3)-C(25)      | 118.11(11) |
| C(4)-C(3)-C(2)       | 121.06(11) |
| C(25)-C(3)-C(2)      | 120.79(11) |
| C(3)-C(4)-C(5)       | 121.72(11) |
| C(6)-C(5)-C(4)       | 118.98(11) |
| C(6)-C(5)-C(29)      | 123.03(11) |
| C(4)-C(5)-C(29)      | 117.98(10) |
| C(7)-C(6)-C(5)       | 120.95(11) |
| C(6)-C(7)-C(25)      | 118.48(11) |
| C(6)-C(7)-C(8)       | 122.42(10) |
| C(25)-C(7)-C(8)      | 119.10(10) |
| C(7)-C(8)-C(9)       | 111.71(9)  |
| C(10)-C(9)-C(26)     | 118.10(11) |
| C(10)-C(9)-C(8)      | 119.41(10) |
| C(26)-C(9)-C(8)      | 122.39(11) |
| C(9)-C(10)-C(11)     | 121.99(11) |
| C(10)-C(11)-C(12)    | 118.89(11) |

|                   |            |
|-------------------|------------|
| C(10)-C(11)-C(35) | 118.96(10) |
| C(12)-C(11)-C(35) | 122.08(11) |
| C(13)-C(12)-C(11) | 120.89(11) |
| C(12)-C(13)-C(26) | 118.84(11) |
| C(12)-C(13)-C(14) | 119.27(11) |
| C(26)-C(13)-C(14) | 121.87(11) |
| C(13)-C(14)-C(15) | 112.06(9)  |
| C(16)-C(15)-C(27) | 118.54(11) |
| C(16)-C(15)-C(14) | 120.41(11) |
| C(27)-C(15)-C(14) | 121.02(11) |
| C(15)-C(16)-C(17) | 121.27(11) |
| C(18)-C(17)-C(16) | 118.78(11) |
| C(18)-C(17)-C(41) | 118.40(11) |
| C(16)-C(17)-C(41) | 122.82(11) |
| C(19)-C(18)-C(17) | 121.76(11) |
| C(18)-C(19)-C(27) | 118.29(11) |
| C(18)-C(19)-C(20) | 119.71(10) |
| C(27)-C(19)-C(20) | 122.00(11) |
| C(21)-C(20)-C(19) | 114.12(10) |
| C(22)-C(21)-C(28) | 119.13(11) |
| C(22)-C(21)-C(20) | 119.89(11) |
| C(28)-C(21)-C(20) | 120.97(10) |
| C(21)-C(22)-C(23) | 121.68(11) |
| C(22)-C(23)-C(24) | 118.32(11) |
| C(22)-C(23)-C(47) | 121.88(11) |
| C(24)-C(23)-C(47) | 119.79(11) |
| C(1)-C(24)-C(23)  | 121.87(11) |
| O(1)-C(25)-C(7)   | 116.80(10) |
| O(1)-C(25)-C(3)   | 121.44(11) |
| C(7)-C(25)-C(3)   | 121.73(11) |
| O(2)-C(26)-C(13)  | 120.90(10) |
| O(2)-C(26)-C(9)   | 118.12(11) |
| C(13)-C(26)-C(9)  | 120.96(11) |
| O(3)-C(27)-C(15)  | 117.39(10) |
| O(3)-C(27)-C(19)  | 121.23(11) |
| C(15)-C(27)-C(19) | 121.35(11) |
| O(4)-C(28)-C(21)  | 119.39(10) |



|                   |            |
|-------------------|------------|
| O(4)-C(28)-C(1)   | 120.45(10) |
| C(21)-C(28)-C(1)  | 120.16(11) |
| O(5)-C(29)-C(5)   | 119.84(12) |
| O(5)-C(29)-C(30)  | 120.25(12) |
| C(5)-C(29)-C(30)  | 119.90(10) |
| C(29)-C(30)-C(31) | 112.21(10) |
| C(32)-C(31)-C(30) | 114.16(10) |
| C(31)-C(32)-C(33) | 111.61(10) |
| C(34)-C(33)-C(32) | 112.98(11) |
| O(6)-C(35)-C(11)  | 119.61(11) |
| O(6)-C(35)-C(36)  | 122.02(12) |
| C(11)-C(35)-C(36) | 118.36(11) |
| C(35)-C(36)-C(37) | 115.09(12) |
| C(36)-C(37)-C(38) | 111.48(12) |
| C(39)-C(38)-C(37) | 115.78(13) |
| C(40)-C(39)-C(38) | 113.30(13) |
| O(7)-C(41)-C(17)  | 120.33(12) |
| O(7)-C(41)-C(42)  | 120.97(12) |
| C(17)-C(41)-C(42) | 118.70(11) |
| C(41)-C(42)-C(43) | 114.90(11) |
| C(44)-C(43)-C(42) | 115.03(10) |
| C(43)-C(44)-C(45) | 112.13(10) |
| C(44)-C(45)-C(46) | 112.81(12) |
| O(8)-C(47)-C(23)  | 121.45(12) |
| O(8)-C(47)-C(48)  | 120.63(12) |
| C(23)-C(47)-C(48) | 117.92(11) |
| C(47)-C(48)-C(49) | 115.72(11) |
| C(48)-C(49)-C(50) | 111.47(11) |
| C(51)-C(50)-C(49) | 114.36(12) |
| C(52)-C(51)-C(50) | 112.82(13) |
| C(58)-C(53)-C(54) | 112.24(11) |
| C(58)-C(53)-C(59) | 109.47(12) |
| C(54)-C(53)-C(59) | 110.58(12) |
| C(58)-C(53)-N(1)  | 111.43(12) |
| C(54)-C(53)-N(1)  | 106.74(10) |
| C(59)-C(53)-N(1)  | 106.20(11) |
| C(55)-C(54)-C(53) | 113.80(11) |

Supplementary Material (ESI) for Chemical Communications  
This journal is © The Royal Society of Chemistry 2006

|                   |            |
|-------------------|------------|
| C(56)-C(55)-C(54) | 109.44(11) |
| C(55)-C(56)-C(57) | 113.76(11) |
| C(61)-C(57)-C(60) | 109.34(11) |
| C(61)-C(57)-C(56) | 110.80(11) |
| C(60)-C(57)-C(56) | 112.36(11) |
| C(61)-C(57)-N(1)  | 105.83(10) |
| C(60)-C(57)-N(1)  | 111.76(11) |
| C(56)-C(57)-N(1)  | 106.54(10) |

---

Symmetry transformations used to generate equivalent atoms:

Table 4. Anisotropic displacement parameters ( $\text{\AA}^2 \times 10^3$ ) for Gena34. The anisotropic displacement factor exponent takes the form:  $-2\pi^2 [ h^2 a^{*2} U^{11} + \dots + 2 h k a^* b^* U^{12} ]$

|        | U <sup>11</sup> | U <sup>22</sup> | U <sup>33</sup> | U <sup>23</sup> | U <sup>13</sup> | U <sup>12</sup> |
|--------|-----------------|-----------------|-----------------|-----------------|-----------------|-----------------|
| O(11)  | 53(1)           | 33(1)           | 49(1)           | 7(1)            | 10(1)           | 5(1)            |
| C(62)  | 59(1)           | 58(1)           | 30(1)           | 3(1)            | 31(1)           | 5(1)            |
| C(63)  | 58(1)           | 32(1)           | 41(1)           | 5(1)            | 3(1)            | -1(1)           |
| O(11A) | 53(1)           | 33(1)           | 49(1)           | 7(1)            | 10(1)           | 5(1)            |
| C(62A) | 59(1)           | 58(1)           | 30(1)           | 3(1)            | 31(1)           | 5(1)            |
| C(63A) | 58(1)           | 32(1)           | 41(1)           | 5(1)            | 3(1)            | -1(1)           |
| O(11B) | 53(1)           | 33(1)           | 49(1)           | 7(1)            | 10(1)           | 5(1)            |
| C(62B) | 59(1)           | 58(1)           | 30(1)           | 3(1)            | 31(1)           | 5(1)            |
| C(63B) | 58(1)           | 32(1)           | 41(1)           | 5(1)            | 3(1)            | -1(1)           |
| O(1)   | 25(1)           | 20(1)           | 33(1)           | -6(1)           | -7(1)           | 5(1)            |
| O(2)   | 17(1)           | 19(1)           | 33(1)           | 1(1)            | -2(1)           | 0(1)            |
| O(3)   | 22(1)           | 20(1)           | 29(1)           | -3(1)           | 3(1)            | -5(1)           |
| O(4)   | 15(1)           | 19(1)           | 30(1)           | -3(1)           | 1(1)            | -2(1)           |
| O(5)   | 63(1)           | 38(1)           | 35(1)           | -14(1)          | -21(1)          | 23(1)           |
| O(6)   | 22(1)           | 30(1)           | 28(1)           | 0(1)            | -2(1)           | 0(1)            |
| O(7)   | 42(1)           | 23(1)           | 44(1)           | -8(1)           | 17(1)           | -11(1)          |
| O(8)   | 48(1)           | 36(1)           | 31(1)           | 1(1)            | -11(1)          | -10(1)          |
| O(9)   | 14(1)           | 52(1)           | 26(1)           | -12(1)          | -1(1)           | -5(1)           |
| O(10)  | 18(1)           | 36(1)           | 40(1)           | -12(1)          | 0(1)            | 1(1)            |
| N(1)   | 14(1)           | 29(1)           | 20(1)           | -3(1)           | 0(1)            | 0(1)            |
| C(1)   | 19(1)           | 17(1)           | 25(1)           | -3(1)           | 7(1)            | 2(1)            |
| C(2)   | 22(1)           | 19(1)           | 25(1)           | -1(1)           | 7(1)            | 0(1)            |
| C(3)   | 20(1)           | 17(1)           | 23(1)           | 0(1)            | 6(1)            | -2(1)           |
| C(4)   | 25(1)           | 19(1)           | 19(1)           | 0(1)            | 4(1)            | -1(1)           |
| C(5)   | 23(1)           | 18(1)           | 20(1)           | 1(1)            | 3(1)            | 0(1)            |
| C(6)   | 21(1)           | 16(1)           | 22(1)           | 1(1)            | 3(1)            | -1(1)           |
| C(7)   | 19(1)           | 16(1)           | 22(1)           | 0(1)            | 2(1)            | -3(1)           |
| C(8)   | 20(1)           | 15(1)           | 22(1)           | -1(1)           | 1(1)            | -1(1)           |
| C(9)   | 21(1)           | 14(1)           | 20(1)           | -3(1)           | -1(1)           | -2(1)           |
| C(10)  | 21(1)           | 17(1)           | 20(1)           | -2(1)           | -2(1)           | 1(1)            |
| C(11)  | 20(1)           | 18(1)           | 21(1)           | -4(1)           | 0(1)            | -1(1)           |
| C(12)  | 22(1)           | 19(1)           | 20(1)           | -2(1)           | 0(1)            | -2(1)           |

|       |       |       |       |       |       |        |
|-------|-------|-------|-------|-------|-------|--------|
| C(13) | 22(1) | 15(1) | 18(1) | -2(1) | -3(1) | -1(1)  |
| C(14) | 24(1) | 16(1) | 21(1) | -1(1) | -3(1) | 0(1)   |
| C(15) | 21(1) | 16(1) | 21(1) | 1(1)  | -4(1) | 1(1)   |
| C(16) | 23(1) | 19(1) | 20(1) | 2(1)  | -2(1) | 1(1)   |
| C(17) | 21(1) | 17(1) | 23(1) | 2(1)  | 0(1)  | 0(1)   |
| C(18) | 22(1) | 15(1) | 23(1) | -1(1) | -2(1) | 0(1)   |
| C(19) | 19(1) | 16(1) | 23(1) | 0(1)  | -1(1) | 2(1)   |
| C(20) | 19(1) | 16(1) | 27(1) | -2(1) | 1(1)  | 1(1)   |
| C(21) | 17(1) | 17(1) | 25(1) | -3(1) | 3(1)  | 1(1)   |
| C(22) | 18(1) | 18(1) | 26(1) | -4(1) | 5(1)  | -1(1)  |
| C(23) | 19(1) | 22(1) | 24(1) | -5(1) | 4(1)  | 0(1)   |
| C(24) | 21(1) | 22(1) | 23(1) | -3(1) | 3(1)  | 3(1)   |
| C(25) | 18(1) | 18(1) | 23(1) | 1(1)  | 1(1)  | -2(1)  |
| C(26) | 18(1) | 17(1) | 22(1) | -4(1) | -2(1) | -2(1)  |
| C(27) | 17(1) | 17(1) | 25(1) | 2(1)  | -2(1) | 0(1)   |
| C(28) | 14(1) | 18(1) | 26(1) | -5(1) | 4(1)  | 1(1)   |
| C(29) | 29(1) | 23(1) | 22(1) | 0(1)  | 0(1)  | 4(1)   |
| C(30) | 28(1) | 23(1) | 24(1) | 0(1)  | -2(1) | 6(1)   |
| C(31) | 25(1) | 22(1) | 23(1) | 1(1)  | 0(1)  | 3(1)   |
| C(32) | 27(1) | 24(1) | 23(1) | 1(1)  | 0(1)  | 4(1)   |
| C(33) | 27(1) | 28(1) | 28(1) | 3(1)  | -1(1) | 4(1)   |
| C(34) | 36(1) | 32(1) | 38(1) | 8(1)  | 4(1)  | 11(1)  |
| C(35) | 21(1) | 18(1) | 26(1) | -1(1) | 1(1)  | -2(1)  |
| C(36) | 27(1) | 43(1) | 34(1) | 12(1) | 8(1)  | 7(1)   |
| C(37) | 24(1) | 42(1) | 36(1) | 9(1)  | 10(1) | 0(1)   |
| C(38) | 29(1) | 41(1) | 34(1) | -1(1) | 6(1)  | -2(1)  |
| C(39) | 36(1) | 39(1) | 39(1) | -6(1) | 4(1)  | 0(1)   |
| C(40) | 41(1) | 42(1) | 52(1) | -6(1) | -8(1) | 1(1)   |
| C(41) | 25(1) | 19(1) | 26(1) | 2(1)  | 1(1)  | -1(1)  |
| C(42) | 28(1) | 25(1) | 24(1) | 0(1)  | 3(1)  | -4(1)  |
| C(43) | 27(1) | 27(1) | 22(1) | 3(1)  | 2(1)  | -3(1)  |
| C(44) | 26(1) | 24(1) | 23(1) | 2(1)  | 2(1)  | -2(1)  |
| C(45) | 28(1) | 26(1) | 31(1) | 2(1)  | 4(1)  | -3(1)  |
| C(46) | 32(1) | 53(1) | 39(1) | 0(1)  | -1(1) | -12(1) |
| C(47) | 26(1) | 26(1) | 25(1) | -6(1) | 2(1)  | -2(1)  |
| C(48) | 25(1) | 27(1) | 27(1) | -4(1) | 0(1)  | -5(1)  |
| C(49) | 28(1) | 29(1) | 31(1) | -4(1) | -2(1) | -7(1)  |

Supplementary Material (ESI) for Chemical Communications  
This journal is © The Royal Society of Chemistry 2006

|       |       |       |       |        |       |        |
|-------|-------|-------|-------|--------|-------|--------|
| C(50) | 32(1) | 28(1) | 29(1) | -2(1)  | 0(1)  | -7(1)  |
| C(51) | 39(1) | 35(1) | 33(1) | -7(1)  | 3(1)  | -13(1) |
| C(52) | 74(1) | 46(1) | 46(1) | -10(1) | 10(1) | -29(1) |
| C(53) | 19(1) | 36(1) | 22(1) | 4(1)   | 4(1)  | 1(1)   |
| C(54) | 23(1) | 28(1) | 30(1) | 3(1)   | 4(1)  | -3(1)  |
| C(55) | 18(1) | 29(1) | 32(1) | -4(1)  | -1(1) | -3(1)  |
| C(56) | 20(1) | 27(1) | 25(1) | 2(1)   | -4(1) | -1(1)  |
| C(57) | 19(1) | 23(1) | 28(1) | 1(1)   | 0(1)  | 0(1)   |
| C(58) | 25(1) | 60(1) | 25(1) | -5(1)  | 7(1)  | -1(1)  |
| C(59) | 33(1) | 50(1) | 36(1) | 18(1)  | 4(1)  | 10(1)  |
| C(60) | 27(1) | 27(1) | 51(1) | -10(1) | 5(1)  | 0(1)   |
| C(61) | 28(1) | 34(1) | 34(1) | 6(1)   | 5(1)  | -4(1)  |

---

Table 5. Hydrogen coordinates ( $\times 10^4$ ) and isotropic displacement parameters ( $\text{\AA}^2 \times 10^{-3}$ ) for Gena34.

|        | x         | y        | z        | U(eq) |
|--------|-----------|----------|----------|-------|
| H(11)  | -1290(30) | 7130(13) | 7134(12) | 61(8) |
| H(62A) | -2661     | 8176     | 7049     | 56    |
| H(62B) | -3182     | 7539     | 7245     | 56    |
| H(63A) | -3116     | 7802     | 6131     | 53    |
| H(63B) | -4358     | 7942     | 6436     | 53    |
| H(63C) | -3878     | 7257     | 6380     | 53    |
| H(11A) | -1591     | 8154     | 7405     | 67    |
| H(62C) | -2518     | 7326     | 7080     | 56    |
| H(62D) | -1816     | 7650     | 6612     | 56    |
| H(63D) | -4183     | 8162     | 6652     | 53    |
| H(63E) | -4346     | 7444     | 6585     | 53    |
| H(63F) | -3663     | 7826     | 6148     | 53    |
| H(11B) | -232      | 7061     | 6924     | 67    |
| H(62E) | -1978     | 7125     | 6710     | 56    |
| H(62F) | -1683     | 7790     | 6539     | 56    |
| H(63G) | -3681     | 7468     | 6979     | 53    |
| H(63H) | -3207     | 8156     | 6942     | 53    |
| H(63I) | -2846     | 7773     | 7483     | 53    |
| H(4)   | 3314(18)  | 8015(9)  | 9270(8)  | 49(5) |
| H(6)   | 3514(16)  | 8065(8)  | 10490(7) | 35(4) |
| H(3)   | 3398(18)  | 7202(8)  | 9926(8)  | 45(5) |
| H(5)   | -4940(20) | 7171(10) | 9016(9)  | 68(7) |
| H(101) | -5110(20) | 8381(9)  | 9802(8)  | 56(6) |
| H(102) | -3880(20) | 8559(10) | 10013(9) | 72(7) |
| H(2)   | -3629(15) | 7709(7)  | 9403(6)  | 24(4) |
| H(2A)  | 2409      | 7899     | 7881     | 26    |
| H(2B)  | 3471      | 7914     | 8390     | 26    |
| H(4)   | 590       | 8567     | 7853     | 25    |
| H(6)   | 321       | 9797     | 9047     | 24    |
| H(8A)  | 1913      | 9785     | 9847     | 23    |
| H(8B)  | 3050      | 9295     | 9880     | 23    |

Supplementary Material (ESI) for Chemical Communications  
This journal is © The Royal Society of Chemistry 2006

|        |       |       |       |    |
|--------|-------|-------|-------|----|
| H(10)  | -279  | 9399  | 10064 | 23 |
| H(12)  | -296  | 8089  | 11201 | 24 |
| H(14A) | 1730  | 7581  | 11532 | 25 |
| H(14B) | 2968  | 7660  | 11210 | 25 |
| H(16)  | 268   | 6761  | 11310 | 25 |
| H(18)  | 773   | 5610  | 10081 | 24 |
| H(20A) | 3599  | 6244  | 9708  | 25 |
| H(20B) | 2620  | 5691  | 9597  | 25 |
| H(22)  | 867   | 5759  | 8888  | 25 |
| H(24)  | 765   | 7139  | 7812  | 26 |
| H(30A) | -479  | 10444 | 8192  | 30 |
| H(30B) | -1533 | 10145 | 8533  | 30 |
| H(31A) | -1948 | 10392 | 7399  | 28 |
| H(31B) | -3000 | 10095 | 7740  | 28 |
| H(32A) | -2057 | 11308 | 7891  | 30 |
| H(32B) | -3106 | 11010 | 8237  | 30 |
| H(33A) | -3505 | 11213 | 7094  | 33 |
| H(33B) | -4553 | 10916 | 7439  | 33 |
| H(34A) | -5027 | 11947 | 7269  | 42 |
| H(34B) | -3661 | 12136 | 7573  | 42 |
| H(34C) | -4731 | 11837 | 7905  | 42 |
| H(36A) | -1756 | 9059  | 11515 | 41 |
| H(36B) | -2377 | 8421  | 11330 | 41 |
| H(37A) | -4024 | 8984  | 11619 | 40 |
| H(37B) | -4301 | 8962  | 10975 | 40 |
| H(38A) | -3042 | 9963  | 11543 | 41 |
| H(38B) | -3427 | 9942  | 10906 | 41 |
| H(39A) | -5298 | 9960  | 11663 | 45 |
| H(39B) | -4815 | 10562 | 11388 | 45 |
| H(40A) | -6741 | 10271 | 10919 | 55 |
| H(40B) | -6204 | 9602  | 10831 | 55 |
| H(40C) | -5634 | 10167 | 10529 | 55 |
| H(42A) | -1854 | 6307  | 11221 | 31 |
| H(42B) | -904  | 5947  | 11652 | 31 |
| H(43A) | -2219 | 5051  | 11438 | 30 |
| H(43B) | -2863 | 5568  | 11770 | 30 |
| H(44A) | -3431 | 5392  | 10632 | 29 |

|        |       |      |       |    |
|--------|-------|------|-------|----|
| H(44B) | -4098 | 5894 | 10974 | 29 |
| H(45A) | -4978 | 5093 | 11479 | 34 |
| H(45B) | -4389 | 4611 | 11093 | 34 |
| H(46A) | -6582 | 4766 | 10807 | 50 |
| H(46B) | -5737 | 4995 | 10346 | 50 |
| H(46C) | -6329 | 5476 | 10734 | 50 |
| H(48A) | -1041 | 5489 | 8481  | 32 |
| H(48B) | -70   | 5187 | 8104  | 32 |
| H(49A) | -1707 | 5152 | 7380  | 36 |
| H(49B) | -2683 | 5473 | 7746  | 36 |
| H(50A) | -1569 | 4298 | 7959  | 36 |
| H(50B) | -2494 | 4621 | 8344  | 36 |
| H(51A) | -4193 | 4583 | 7615  | 43 |
| H(51B) | -3259 | 4198 | 7274  | 43 |
| H(52A) | -4667 | 3548 | 7684  | 66 |
| H(52B) | -4118 | 3794 | 8267  | 66 |
| H(52C) | -3212 | 3408 | 7915  | 66 |
| H(54A) | -848  | 8375 | 8976  | 32 |
| H(54B) | -1794 | 8436 | 9438  | 32 |
| H(55A) | -160  | 7412 | 9311  | 31 |
| H(55B) | 76    | 7911 | 9780  | 31 |
| H(56A) | -1832 | 7618 | 10136 | 30 |
| H(56B) | -903  | 7044 | 10116 | 30 |
| H(58A) | -2647 | 7215 | 8214  | 44 |
| H(58B) | -1227 | 7251 | 8520  | 44 |
| H(58C) | -1722 | 7768 | 8097  | 44 |
| H(59A) | -3854 | 8523 | 8875  | 48 |
| H(59B) | -4077 | 8139 | 8328  | 48 |
| H(59C) | -2963 | 8639 | 8399  | 48 |
| H(60A) | -2665 | 6327 | 8969  | 42 |
| H(60B) | -1796 | 6116 | 9502  | 42 |
| H(60C) | -1234 | 6583 | 9094  | 42 |
| H(61A) | -4147 | 6509 | 9715  | 38 |
| H(61B) | -3899 | 7093 | 10094 | 38 |
| H(61C) | -3051 | 6494 | 10213 | 38 |

---



Table 6. Hydrogen bonds for Gena34 [ $\text{\AA}$  and  $^\circ$ ].

| D-H...A               | d(D-H)    | d(H...A)  | d(D...A)   | $\angle(\text{DHA})$ |
|-----------------------|-----------|-----------|------------|----------------------|
| O(10)-H(101)...O(1)#1 | 0.86(2)   | 1.98(2)   | 2.7644(14) | 150.5(19)            |
| O(11A)-H(11A)...O(5)  | 0.84      | 2.55      | 2.753(8)   | 95.0                 |
| O(11B)-H(11B)...O(8)  | 0.84      | 2.36      | 2.825(8)   | 115.9                |
| O(11)-H(11)...O(8)    | 0.92(3)   | 2.03(3)   | 2.952(2)   | 174(3)               |
| N(1)-H(2)...O(10)     | 0.917(15) | 1.877(15) | 2.7929(15) | 177.1(14)            |
| O(10)-H(102)...O(6)   | 0.87(2)   | 1.93(2)   | 2.7892(14) | 167(2)               |
| O(9)-H(5)...O(4)      | 0.89(2)   | 1.70(15)  | 2.581(8)   | 171.2(18)            |
| O(2)-H(6)...O(3)      | 0.852(17) | 1.920(17) | 2.7320(13) | 158.8(16)            |
| O(3)-H(3)...O(4)      | 0.891(19) | 1.720(19) | 2.6047(13) | 171.5(18)            |
| O(1)-H(4)...O(4)      | 0.83(2)   | 1.70(2)   | 2.5108(13) | 168.7(19)            |

Symmetry transformations used to generate equivalent atoms:

#1 x-1,y,z
